# Supplementary material for: Highly sensitive electrochemical detection of hazardous 2,4-dinitrophenylhydrazine using MgCo-TiO 2 /g-C 3 N 4 heterostructure nanocomposites
Source: Royal Society of Chemistry journal article supplement (doi:10.1039/d5ra07106b), 2025-01-01
Supplement: d5ra07106b1.pdf [file d5ra07106b1.pdf]

**Highly sensitive electrochemical detection of hazardous 2,4-dinitrophenylhydrazine using  
MgCo-TiO<sub>2</sub>/g-C<sub>3</sub>N<sub>4</sub> heterostructure nanocomposites**

Samuel Chufamo Jikamo <sup>a,b</sup>, T. Siva Rao\* <sup>a</sup> P. Shyamala <sup>a</sup>, Singupilla Sai Supriya <sup>a</sup>, Sandhya Rani Nayak <sup>a</sup>, Nageswararao Kadiyala <sup>a,c</sup>, Winni Teja Dokka <sup>a,d</sup> M. Ravichandra<sup>e</sup>, M.V Kishore<sup>a</sup>

<sup>a</sup> Dept of Chemistry, Andhra University, Visakhapatnam, India-530003.

<sup>b</sup> Dept of Chemistry, College of Natural and Computational sciences, Wolaiat Sodo University, Wolaita Sodo, Ethiopia.

<sup>c</sup> Dept of Chemistry, Dr. V S Krishna Govt. Degree College(A), Visakhapatnam, India-530013.

<sup>d</sup> Dept of Chemistry, Govt. Degree College Chintalpudi, West Godavari, India-534460.

<sup>e</sup> C4-101, Staff Quarters, Indian Institute of Technology Patna, Bihta, Bihar, India-801106.

\*Corresponding author: T.Siva Rao

Corresponding author email: [sivaraoau@gmail.com](mailto:sivaraoau@gmail.com)

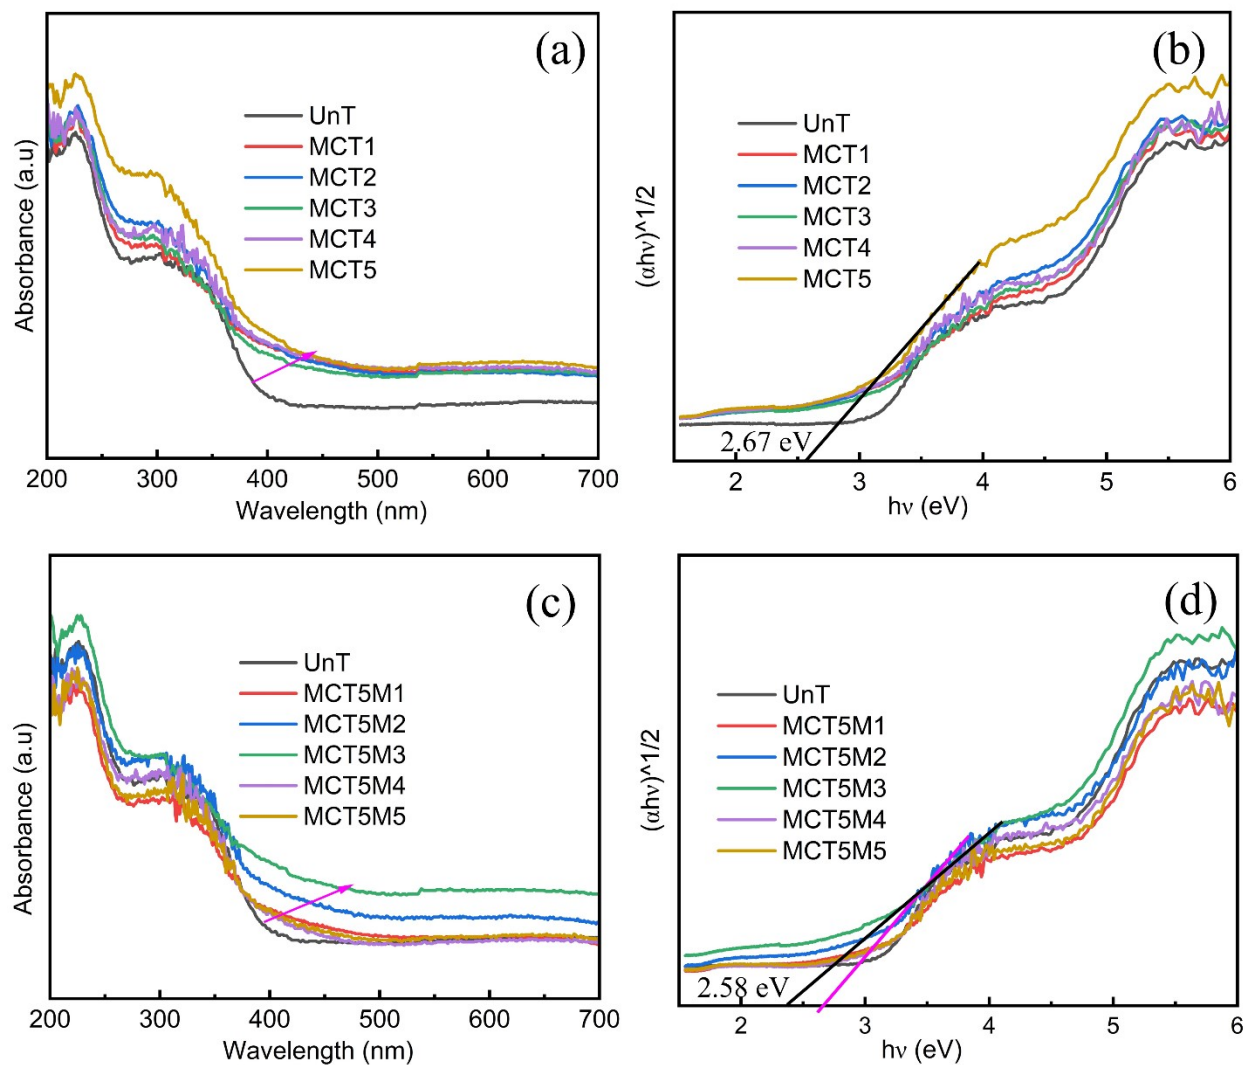

Fig. S1 UV-Vis DRS spectra for sol gel synthesized absorbance (a) and along with the square root of Kubelka–Munk functions (b) and microwave assisted sol gel synthesized materials (c) and along with the square root of Kubelka–Munk functions (d).

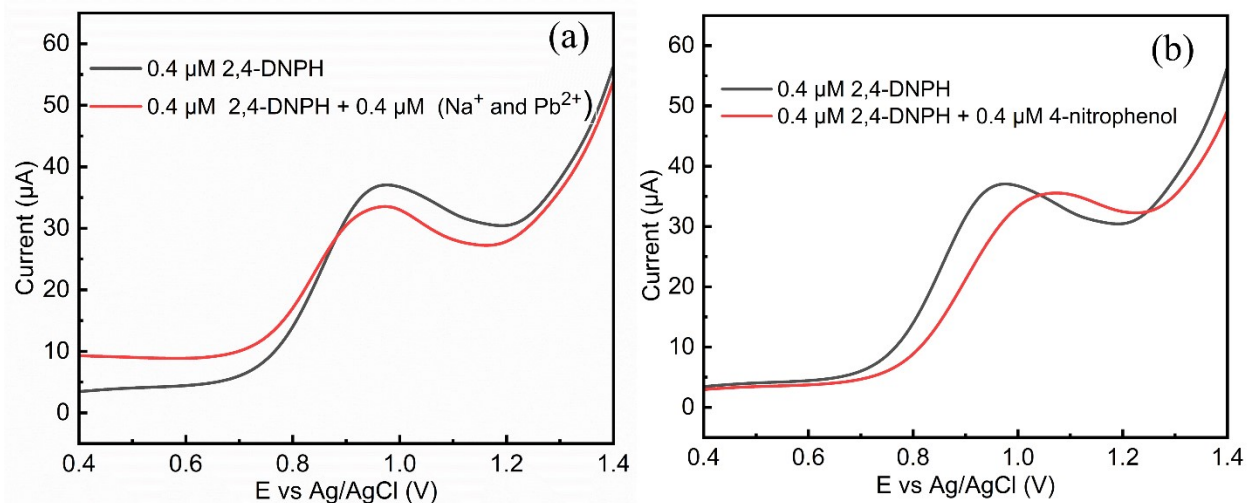

Fig. S2 LSV Voltammogram metals ions ( $\text{Na}^+$  and  $\text{Pb}^{2+}$ ) (a) and 4-nitrophenol(b) interferences in 0.4  $\mu\text{M}$  2,4-DNPH (pH 3) at scan 30 mV/s scan rate by  $\text{MgCo-TiO}_2/\text{g-C}_3\text{N}_4/\text{GCE}$  sensor.

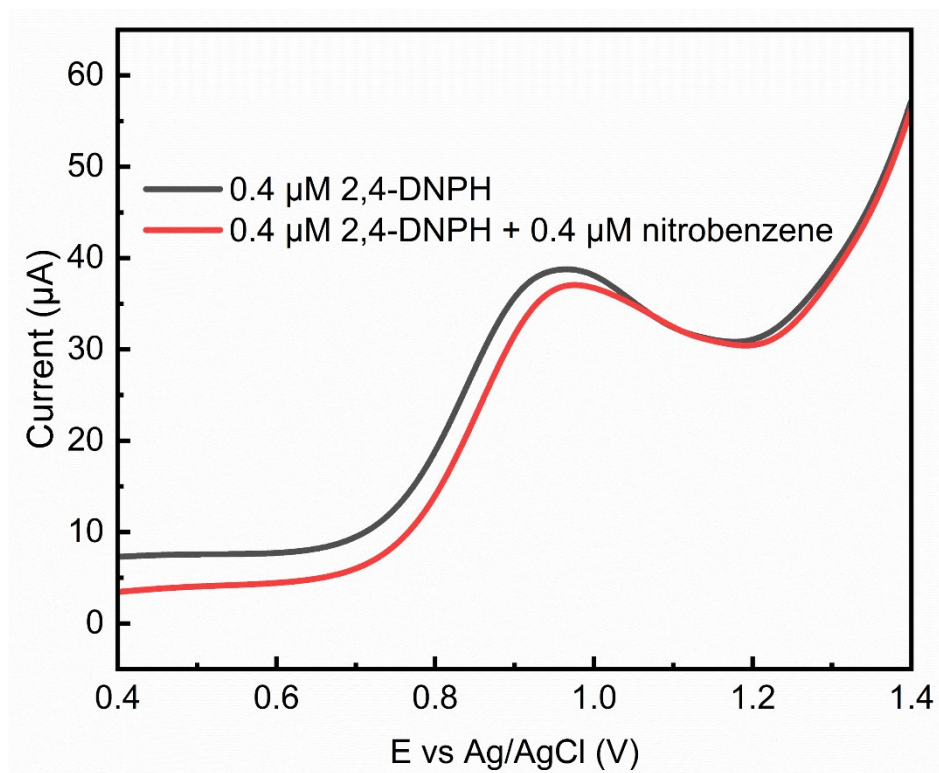

Fig.S3 LSV voltammogram 4-nitrobenzene interferences in 0.4  $\mu\text{M}$  2,4-DNPH (pH 3) at scan 30 mV/s scan rate by  $\text{MgCo-TiO}_2/\text{g-C}_3\text{N}_4/\text{GCE}$  sensor.

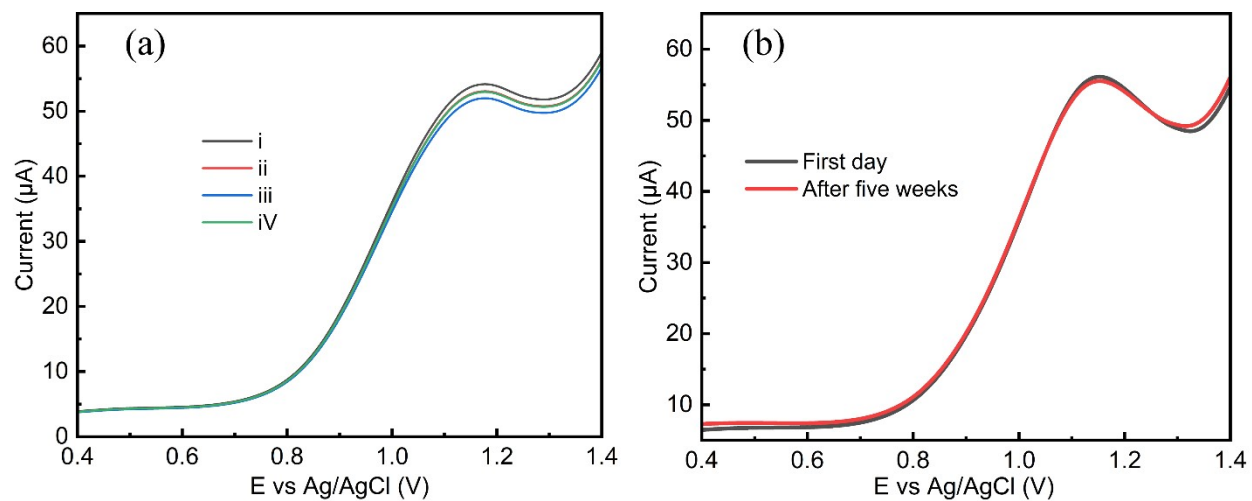

Fig.S4 LSV voltammogram of four consecutive measurements **(a)** and stability**(b)** in 0.4  $\mu\text{M}$  2,4-DNPH (pH 3) at scan 30 mV/s scan rate by MgCo-TiO<sub>2</sub>/g-C<sub>3</sub>N<sub>4</sub>/GCE sensor.
